Table S1. Energy intake and body mass in non-reproductive and reproductive mice during lactation and post lactation. The data are expressed as means  $\pm$  S.D. Sample size (n) is 8 for energy intake and body mass in non-reproductive mice.

| DOL       | Non-reproductive mice<br>(n=8)           |                   | Reproductive mice                        |                    |                  |                  |    |
|-----------|------------------------------------------|-------------------|------------------------------------------|--------------------|------------------|------------------|----|
|           | Energy intake<br>(kJ day <sup>-1</sup> ) | Body mass<br>(g)  | Energy intake<br>(kJ day <sup>-1</sup> ) | (n)                | Body mass<br>(g) | (n)              |    |
| Lactation | 1                                        | 71.10 $\pm$ 14.66 | 145.01 $\pm$ 44.40                       | 26                 |                  |                  |    |
|           | 2                                        | 73.58 $\pm$ 11.45 | 34.74 $\pm$ 2.82                         | 183.01 $\pm$ 37.91 | 26               | 41.60 $\pm$ 3.41 | 26 |
|           | 3                                        | 73.29 $\pm$ 13.23 | 34.85 $\pm$ 2.91                         | 201.66 $\pm$ 46.94 | 26               | 42.63 $\pm$ 3.12 | 26 |
|           | 4                                        | 76.25 $\pm$ 11.49 | 34.82 $\pm$ 2.90                         | 222.98 $\pm$ 48.26 | 26               | 42.93 $\pm$ 3.48 | 26 |
|           | 5                                        | 66.96 $\pm$ 10.55 | 34.86 $\pm$ 2.56                         | 234.11 $\pm$ 47.33 | 26               | 44.18 $\pm$ 3.41 | 26 |
|           | 6                                        | 77.00 $\pm$ 17.63 | 34.93 $\pm$ 2.80                         | 240.99 $\pm$ 48.00 | 26               | 44.67 $\pm$ 3.69 | 26 |
|           | 7                                        | 72.47 $\pm$ 19.80 | 34.96 $\pm$ 3.06                         | 245.55 $\pm$ 51.35 | 26               | 44.89 $\pm$ 3.71 | 26 |
|           | 8                                        | 75.62 $\pm$ 16.46 | 35.17 $\pm$ 3.18                         | 246.94 $\pm$ 53.80 | 26               | 45.29 $\pm$ 3.80 | 26 |
|           | 9                                        | 72.84 $\pm$ 13.73 | 35.31 $\pm$ 3.08                         | 254.32 $\pm$ 55.93 | 26               | 45.51 $\pm$ 4.05 | 26 |
|           | 10                                       | 76.89 $\pm$ 13.99 | 35.56 $\pm$ 2.86                         | 263.70 $\pm$ 53.94 | 26               | 45.61 $\pm$ 3.94 | 26 |
|           | 11                                       | 68.81 $\pm$ 13.64 | 35.56 $\pm$ 3.18                         | 267.93 $\pm$ 55.43 | 25               | 46.08 $\pm$ 3.63 | 26 |
|           | 12                                       | 71.24 $\pm$ 18.40 | 35.75 $\pm$ 3.35                         | 273.99 $\pm$ 56.79 | 26               | 46.12 $\pm$ 4.01 | 26 |
|           | 13                                       | 64.62 $\pm$ 17.88 | 35.88 $\pm$ 3.25                         | 271.23 $\pm$ 49.46 | 26               | 47.00 $\pm$ 4.01 | 26 |
|           | 14                                       | 61.68 $\pm$ 9.45  | 35.78 $\pm$ 3.30                         | 280.55 $\pm$ 62.08 | 26               | 46.76 $\pm$ 3.76 | 26 |
|           | 15                                       | 68.58 $\pm$ 11.38 | 35.60 $\pm$ 3.29                         | 268.85 $\pm$ 57.62 | 26               | 47.11 $\pm$ 3.83 | 26 |
|           | 16                                       | 68.95 $\pm$ 13.58 | 35.69 $\pm$ 3.61                         | 266.90 $\pm$ 65.20 | 26               | 47.16 $\pm$ 3.65 | 26 |
|           | 17                                       | 75.18 $\pm$ 24.77 | 35.45 $\pm$ 3.25                         | 263.84 $\pm$ 65.35 | 26               | 46.58 $\pm$ 4.07 | 26 |
|           | 18                                       | 68.38 $\pm$ 11.65 | 36.05 $\pm$ 3.90                         | 284.41 $\pm$ 63.11 | 25               | 46.23 $\pm$ 3.86 | 26 |
|           | 19                                       | 69.95 $\pm$ 10.57 | 36.17 $\pm$ 3.82                         | 307.08 $\pm$ 70.64 | 23               | 44.76 $\pm$ 3.88 | 25 |
|           | 20                                       | 68.77 $\pm$ 10.56 | 36.35 $\pm$ 3.68                         | 341.85 $\pm$ 82.99 | 21               | 44.19 $\pm$ 4.39 | 23 |
| Recovery  | 21                                       | 62.93 $\pm$ 18.91 | 36.17 $\pm$ 3.89                         | 122.76 $\pm$ 33.33 | 18               | 44.20 $\pm$ 4.05 | 18 |
|           | 22                                       | 66.98 $\pm$ 11.81 | 36.26 $\pm$ 3.78                         | 96.79 $\pm$ 20.96  | 18               | 44.47 $\pm$ 3.04 | 18 |
|           | 23                                       | 74.18 $\pm$ 13.11 | 36.35 $\pm$ 3.84                         | 96.33 $\pm$ 27.82  | 18               | 43.22 $\pm$ 2.27 | 18 |
|           | 24                                       | 73.36 $\pm$ 18.36 | 36.42 $\pm$ 3.83                         | 89.54 $\pm$ 25.51  | 18               | 41.92 $\pm$ 1.96 | 18 |
|           | 25                                       | 64.60 $\pm$ 10.83 | 36.52 $\pm$ 3.96                         | 89.03 $\pm$ 24.08  | 17               | 41.36 $\pm$ 1.87 | 18 |
|           | 26                                       | 73.39 $\pm$ 15.44 | 36.64 $\pm$ 3.82                         | 82.87 $\pm$ 15.34  | 17               | 41.36 $\pm$ 1.98 | 18 |
|           | 27                                       | 69.10 $\pm$ 9.39  | 36.62 $\pm$ 4.07                         | 83.45 $\pm$ 15.46  | 17               | 41.62 $\pm$ 1.96 | 17 |
|           | 28                                       | 77.57 $\pm$ 17.45 | 36.75 $\pm$ 4.11                         | 79.82 $\pm$ 13.72  | 16               | 41.67 $\pm$ 1.99 | 17 |
|           | 29                                       | 65.83 $\pm$ 20.30 | 36.51 $\pm$ 4.49                         | 78.35 $\pm$ 11.60  | 16               | 41.88 $\pm$ 2.06 | 17 |
|           | 30                                       | 73.32 $\pm$ 15.44 | 36.64 $\pm$ 4.20                         | 80.54 $\pm$ 12.29  | 16               | 41.94 $\pm$ 2.05 | 17 |

Table S2. Daily activity counts, mean T<sub>b</sub>, active T<sub>b</sub> and Inactive T<sub>b</sub> during lactation and post lactation. The data are expressed as means ± S.D.

|                | DOL | Sample size  | Activity     | Mean T <sub>b</sub> | Active T <sub>b</sub> | Inactive T <sub>b</sub> |
|----------------|-----|--------------|--------------|---------------------|-----------------------|-------------------------|
| Lactation      | 0   | 26           | 16.25 ± 5.64 | 37.65 ± 0.27        | 37.70 ± 0.26          | 37.41 ± 0.27            |
|                | 1   | 26           | 15.17 ± 3.14 | 37.77 ± 0.19        | 37.83 ± 0.19          | 37.48 ± 0.22            |
|                | 2   | 26           | 14.64 ± 3.96 | 37.92 ± 0.21        | 37.98 ± 0.20          | 37.64 ± 0.22            |
|                | 3   | 26           | 12.72 ± 3.31 | 37.95 ± 0.16        | 38.01 ± 0.17          | 37.71 ± 0.20            |
|                | 4   | 26           | 11.84 ± 3.47 | 37.98 ± 0.19        | 38.05 ± 0.19          | 37.72 ± 0.22            |
|                | 5   | 26           | 12.22 ± 3.57 | 38.02 ± 0.19        | 38.08 ± 0.19          | 37.79 ± 0.19            |
|                | 6   | 26           | 11.88 ± 4.33 | 38.05 ± 0.15        | 38.11 ± 0.15          | 37.81 ± 0.18            |
|                | 7   | 26           | 11.25 ± 3.95 | 38.05 ± 0.16        | 38.12 ± 0.15          | 37.83 ± 0.18            |
|                | 8   | 26           | 11.34 ± 3.75 | 38.06 ± 0.15        | 38.14 ± 0.16          | 37.79 ± 0.19            |
|                | 9   | 26           | 10.77 ± 3.64 | 38.05 ± 0.16        | 38.14 ± 0.16          | 37.80 ± 0.20            |
|                | 10  | 26           | 11.21 ± 3.87 | 38.07 ± 0.16        | 38.14 ± 0.17          | 37.85 ± 0.17            |
|                | 11  | 26           | 10.87 ± 3.85 | 38.09 ± 0.15        | 38.16 ± 0.15          | 37.86 ± 0.17            |
|                | 12  | 26           | 10.91 ± 3.94 | 38.07 ± 0.21        | 38.14 ± 0.22          | 37.86 ± 0.20            |
|                | 13  | 26           | 10.94 ± 3.66 | 38.11 ± 0.13        | 38.18 ± 0.14          | 37.91 ± 0.17            |
|                | 14  | 26           | 11.43 ± 3.75 | 38.12 ± 0.12        | 38.18 ± 0.13          | 37.90 ± 0.16            |
|                | 15  | 25           | 11.21 ± 3.47 | 38.10 ± 0.16        | 38.14 ± 0.17          | 37.88 ± 0.22            |
|                | 16  | 25           | 11.14 ± 3.36 | 38.01 ± 0.33        | 38.05 ± 0.32          | 37.75 ± 0.37            |
|                | 17  | 25           | 12.20 ± 3.47 | 38.03 ± 0.23        | 38.07 ± 0.23          | 37.75 ± 0.33            |
|                | 18  | 25           | 13.37 ± 3.67 | 37.96 ± 0.17        | 38.01 ± 0.18          | 37.64 ± 0.29            |
|                | 19  | 24           | 15.54 ± 4.50 | 37.89 ± 0.17        | 37.97 ± 0.17          | 37.51 ± 0.23            |
| 20             | 22  | 15.93 ± 5.45 | 37.79 ± 0.21 | 37.90 ± 0.19        | 37.39 ± 0.36          |                         |
| Post-lactation | 21  | 17           | 14.14 ± 3.86 | 37.52 ± 0.34        | 37.79 ± 0.36          | 37.10 ± 0.61            |
|                | 22  | 17           | 13.98 ± 3.51 | 37.40 ± 0.32        | 37.75 ± 0.23          | 36.84 ± 0.47            |
|                | 23  | 17           | 15.42 ± 3.86 | 37.43 ± 0.28        | 37.75 ± 0.24          | 36.80 ± 0.39            |
|                | 24  | 17           | 17.14 ± 6.40 | 37.45 ± 0.23        | 37.80 ± 0.22          | 36.79 ± 0.33            |
|                | 25  | 17           | 16.22 ± 5.98 | 37.32 ± 0.27        | 37.68 ± 0.28          | 36.73 ± 0.32            |
|                | 26  | 17           | 16.16 ± 4.10 | 37.29 ± 0.30        | 37.68 ± 0.26          | 36.71 ± 0.37            |
|                | 27  | 17           | 17.26 ± 5.96 | 37.34 ± 0.30        | 37.71 ± 0.27          | 36.75 ± 0.36            |
|                | 28  | 17           | 17.37 ± 5.32 | 37.31 ± 0.43        | 37.67 ± 0.34          | 36.73 ± 0.52            |
|                | 29  | 17           | 16.21 ± 5.07 | 37.24 ± 0.43        | 37.64 ± 0.33          | 36.66 ± 0.48            |
|                | 30  | 17           | 15.91 ± 4.67 | 37.22 ± 0.44        | 37.60 ± 0.34          | 36.66 ± 0.47            |

Table S3. Activity levels over the day during baseline, lactation and post lactation. The data are expressed as means  $\pm$  S.D.

| Time (h) | Baseline (n)           | Lactation (n)         | Post lactation (n)     |
|----------|------------------------|-----------------------|------------------------|
| 10       | 11.12 $\pm$ 9.76 (26)  | 11.58 $\pm$ 3.82 (26) | 11.89 $\pm$ 6.68 (17)  |
| 11       | 6.78 $\pm$ 5.29 (26)   | 9.84 $\pm$ 2.33 (26)  | 5.13 $\pm$ 1.52 (17)   |
| 12       | 5.39 $\pm$ 2.98 (26)   | 9.11 $\pm$ 2.11 (26)  | 5.08 $\pm$ 1.14 (17)   |
| 13       | 7.34 $\pm$ 4.65 (26)   | 11.26 $\pm$ 4.45 (26) | 4.12 $\pm$ 1.28 (17)   |
| 14       | 4.90 $\pm$ 2.40 (26)   | 9.79 $\pm$ 2.70 (26)  | 5.19 $\pm$ 1.32 (17)   |
| 15       | 5.14 $\pm$ 2.57 (26)   | 9.43 $\pm$ 3.06 (26)  | 4.49 $\pm$ 1.73 (17)   |
| 16       | 9.00 $\pm$ 4.27 (26)   | 10.53 $\pm$ 3.22 (26) | 6.73 $\pm$ 2.06 (17)   |
| 17       | 12.82 $\pm$ 10.98 (26) | 11.45 $\pm$ 4.31 (26) | 8.72 $\pm$ 2.33 (17)   |
| 18       | 13.24 $\pm$ 11.05 (26) | 11.43 $\pm$ 4.14 (26) | 10.38 $\pm$ 4.11 (17)  |
| 19       | 40.07 $\pm$ 27.27 (26) | 14.49 $\pm$ 5.33 (26) | 23.28 $\pm$ 11.01 (17) |
| 20       | 58.47 $\pm$ 33.54 (26) | 17.08 $\pm$ 6.39 (26) | 34.69 $\pm$ 20.19 (17) |
| 21       | 48.85 $\pm$ 33.52 (26) | 15.80 $\pm$ 6.22 (26) | 30.82 $\pm$ 14.15 (17) |
| 22       | 44.57 $\pm$ 27.75 (26) | 14.43 $\pm$ 4.96 (26) | 26.34 $\pm$ 9.30 (17)  |
| 23       | 42.95 $\pm$ 22.94 (26) | 13.19 $\pm$ 3.98 (26) | 26.19 $\pm$ 11.87 (17) |
| 0        | 38.43 $\pm$ 19.21 (26) | 13.31 $\pm$ 4.53 (26) | 26.90 $\pm$ 11.29 (17) |
| 1        | 32.48 $\pm$ 15.67 (26) | 12.22 $\pm$ 4.07 (26) | 25.14 $\pm$ 11.20 (17) |
| 2        | 22.47 $\pm$ 11.34 (26) | 12.24 $\pm$ 4.68 (26) | 21.14 $\pm$ 8.33 (17)  |
| 3        | 17.23 $\pm$ 8.83 (26)  | 11.70 $\pm$ 3.51 (26) | 17.89 $\pm$ 4.94 (17)  |
| 4        | 17.88 $\pm$ 9.68 (26)  | 12.19 $\pm$ 4.07 (26) | 17.08 $\pm$ 8.07 (17)  |
| 5        | 17.54 $\pm$ 10.17 (26) | 11.33 $\pm$ 3.30 (26) | 15.70 $\pm$ 8.70 (17)  |
| 6        | 16.79 $\pm$ 8.54 (26)  | 12.27 $\pm$ 3.38 (26) | 14.70 $\pm$ 7.95 (17)  |
| 7        | 20.16 $\pm$ 7.26 (26)  | 13.19 $\pm$ 4.56 (26) | 15.10 $\pm$ 6.43 (17)  |
| 8        | 16.79 $\pm$ 9.83 (26)  | 13.82 $\pm$ 4.66 (26) | 15.82 $\pm$ 7.76 (17)  |

Table S4. Activity levels over a day during the four stages of lactation. The data are expressed as means  $\pm$  S.D.

| Time (h) | Lactation             |                       |                       |                        |
|----------|-----------------------|-----------------------|-----------------------|------------------------|
|          | DOL 1-5 (n)           | DOL 6-10 (n)          | DOL 11-15 (n)         | DOL 16-20 (n)          |
| 10       | 14.87 $\pm$ 4.67 (26) | 11.17 $\pm$ 5.55 (26) | 9.64 $\pm$ 3.98 (26)  | 10.44 $\pm$ 4.44 (25)  |
| 11       | 11.93 $\pm$ 4.78 (26) | 10.35 $\pm$ 4.08 (26) | 8.54 $\pm$ 2.98 (26)  | 8.70 $\pm$ 3.57 (25)   |
| 12       | 10.33 $\pm$ 3.31 (26) | 9.63 $\pm$ 4.21 (26)  | 8.59 $\pm$ 2.53 (26)  | 7.97 $\pm$ 1.91 (25)   |
| 13       | 13.47 $\pm$ 6.84 (26) | 10.70 $\pm$ 4.97 (26) | 9.73 $\pm$ 5.49 (26)  | 10.69 $\pm$ 5.64 (25)  |
| 14       | 10.99 $\pm$ 3.81 (26) | 10.18 $\pm$ 4.02 (26) | 9.01 $\pm$ 3.02 (26)  | 8.85 $\pm$ 3.59 (25)   |
| 15       | 10.13 $\pm$ 3.72 (26) | 9.12 $\pm$ 3.13 (26)  | 9.02 $\pm$ 3.65 (26)  | 9.59 $\pm$ 4.43 (25)   |
| 16       | 11.75 $\pm$ 3.61 (26) | 9.90 $\pm$ 4.21 (26)  | 10.80 $\pm$ 4.45 (26) | 10.06 $\pm$ 3.02 (25)  |
| 17       | 12.50 $\pm$ 5.00 (26) | 12.00 $\pm$ 6.69 (26) | 10.93 $\pm$ 5.05 (26) | 10.59 $\pm$ 3.07 (25)  |
| 18       | 12.37 $\pm$ 4.76 (26) | 9.91 $\pm$ 3.64 (26)  | 11.11 $\pm$ 5.30 (26) | 12.65 $\pm$ 5.61 (25)  |
| 19       | 14.86 $\pm$ 5.46 (26) | 12.53 $\pm$ 5.29 (26) | 13.53 $\pm$ 5.78 (26) | 17.41 $\pm$ 7.24 (25)  |
| 20       | 18.32 $\pm$ 6.61 (26) | 14.66 $\pm$ 5.77 (26) | 14.92 $\pm$ 9.72 (26) | 21.09 $\pm$ 8.44 (25)  |
| 21       | 16.53 $\pm$ 6.54 (26) | 14.03 $\pm$ 6.37 (26) | 13.34 $\pm$ 6.68 (26) | 19.96 $\pm$ 10.53 (25) |
| 22       | 15.04 $\pm$ 5.55 (26) | 14.02 $\pm$ 7.73 (26) | 12.54 $\pm$ 3.98 (26) | 16.44 $\pm$ 8.50 (25)  |
| 23       | 14.18 $\pm$ 5.85 (26) | 12.54 $\pm$ 5.23 (26) | 11.46 $\pm$ 4.82 (26) | 15.02 $\pm$ 6.72 (25)  |
| 0        | 13.85 $\pm$ 5.52 (26) | 11.56 $\pm$ 4.42 (26) | 12.53 $\pm$ 7.16 (26) | 15.67 $\pm$ 6.60 (25)  |
| 1        | 14.29 $\pm$ 6.07 (26) | 10.39 $\pm$ 4.79 (26) | 10.29 $\pm$ 4.43 (26) | 14.51 $\pm$ 4.70 (25)  |
| 2        | 14.46 $\pm$ 7.35 (26) | 10.57 $\pm$ 5.01 (26) | 9.81 $\pm$ 3.34 (26)  | 14.52 $\pm$ 6.57 (25)  |
| 3        | 12.44 $\pm$ 4.56 (26) | 10.30 $\pm$ 3.25 (26) | 11.26 $\pm$ 4.32 (26) | 13.10 $\pm$ 5.44 (25)  |
| 4        | 12.52 $\pm$ 4.88 (26) | 10.97 $\pm$ 4.73 (26) | 10.20 $\pm$ 4.34 (26) | 15.54 $\pm$ 6.44 (25)  |
| 5        | 11.13 $\pm$ 4.46 (26) | 10.23 $\pm$ 4.27 (26) | 10.63 $\pm$ 4.54 (26) | 13.63 $\pm$ 4.33 (25)  |
| 6        | 12.37 $\pm$ 5.32 (26) | 10.90 $\pm$ 3.62 (26) | 12.34 $\pm$ 5.45 (26) | 13.78 $\pm$ 3.89 (25)  |
| 7        | 13.48 $\pm$ 5.11 (26) | 12.32 $\pm$ 6.44 (26) | 12.46 $\pm$ 5.70 (26) | 14.70 $\pm$ 5.97 (25)  |
| 8        | 15.14 $\pm$ 7.52 (26) | 12.84 $\pm$ 6.15 (26) | 12.10 $\pm$ 4.73 (26) | 15.41 $\pm$ 4.55 (25)  |

Table S5. Mean  $T_b$  throughout a day during baseline, lactation and post lactation. The data are expressed as means  $\pm$  S.D.

| Time (h) | Baseline (n)      | Lactation (n)     | Post lactation (n) |
|----------|-------------------|-------------------|--------------------|
| 10       | 37.05 ± 0.45 (26) | 37.85 ± 0.21 (26) | 37.25 ± 0.41 (17)  |
| 11       | 36.71 ± 0.29 (26) | 37.66 ± 0.19 (26) | 36.78 ± 0.33 (17)  |
| 12       | 36.55 ± 0.29 (26) | 37.61 ± 0.17 (26) | 36.65 ± 0.31 (17)  |
| 13       | 36.68 ± 0.34 (26) | 37.69 ± 0.25 (26) | 36.56 ± 0.31 (17)  |
| 14       | 36.64 ± 0.27 (26) | 37.71 ± 0.22 (26) | 36.64 ± 0.29 (17)  |
| 15       | 36.58 ± 0.30 (26) | 37.71 ± 0.21 (26) | 36.61 ± 0.31 (17)  |
| 16       | 36.73 ± 0.31 (26) | 37.80 ± 0.20 (26) | 36.76 ± 0.33 (17)  |
| 17       | 36.94 ± 0.34 (26) | 37.92 ± 0.22 (26) | 36.93 ± 0.31 (17)  |
| 18       | 37.06 ± 0.34 (26) | 38.00 ± 0.22 (26) | 37.15 ± 0.33 (17)  |
| 19       | 37.68 ± 0.52 (26) | 38.16 ± 0.20 (26) | 37.62 ± 0.26 (17)  |
| 20       | 38.11 ± 0.55 (26) | 38.34 ± 0.18 (26) | 38.01 ± 0.35 (17)  |
| 21       | 37.98 ± 0.53 (26) | 38.35 ± 0.18 (26) | 38.02 ± 0.35 (17)  |
| 22       | 37.94 ± 0.46 (26) | 38.29 ± 0.15 (26) | 37.95 ± 0.30 (17)  |
| 23       | 37.95 ± 0.41 (26) | 38.24 ± 0.15 (26) | 37.89 ± 0.28 (17)  |
| 0        | 37.81 ± 0.35 (26) | 38.20 ± 0.16 (26) | 37.95 ± 0.32 (17)  |
| 1        | 37.67 ± 0.36 (26) | 38.13 ± 0.16 (26) | 37.83 ± 0.40 (17)  |
| 2        | 37.40 ± 0.39 (26) | 38.09 ± 0.18 (26) | 37.71 ± 0.33 (17)  |
| 3        | 37.22 ± 0.36 (26) | 38.08 ± 0.19 (26) | 37.57 ± 0.33 (17)  |
| 4        | 37.13 ± 0.36 (26) | 38.05 ± 0.21 (26) | 37.46 ± 0.36 (17)  |
| 5        | 37.08 ± 0.46 (26) | 37.99 ± 0.24 (26) | 37.39 ± 0.41 (17)  |
| 6        | 37.12 ± 0.53 (26) | 38.02 ± 0.23 (26) | 37.30 ± 0.47 (17)  |
| 7        | 37.33 ± 0.45 (26) | 38.04 ± 0.20 (26) | 37.34 ± 0.46 (17)  |
| 8        | 37.22 ± 0.47 (26) | 37.97 ± 0.25 (26) | 37.38 ± 0.46 (17)  |

Table S6. Mean  $T_b$  throughout the day during the four stages of lactation. The data are expressed as means  $\pm$  S.D.

| Time<br>(h) | Lactation             |                       |                       |                       |
|-------------|-----------------------|-----------------------|-----------------------|-----------------------|
|             | DOL 1-5 (n)           | DOL 6-10 (n)          | DOL 11-15 (n)         | DOL 16-20 (n)         |
| 10          | 37.93 $\pm$ 0.22 (26) | 37.97 $\pm$ 0.28 (26) | 37.89 $\pm$ 0.19 (26) | 37.66 $\pm$ 0.29 (25) |
| 11          | 37.77 $\pm$ 0.22 (26) | 37.78 $\pm$ 0.20 (26) | 37.69 $\pm$ 0.23 (26) | 37.44 $\pm$ 0.28 (25) |
| 12          | 37.66 $\pm$ 0.21 (26) | 37.76 $\pm$ 0.22 (26) | 37.69 $\pm$ 0.18 (26) | 37.37 $\pm$ 0.27 (25) |
| 13          | 37.78 $\pm$ 0.30 (26) | 37.82 $\pm$ 0.32 (26) | 37.79 $\pm$ 0.28 (26) | 37.53 $\pm$ 0.37 (25) |
| 14          | 37.77 $\pm$ 0.26 (26) | 37.83 $\pm$ 0.25 (26) | 37.81 $\pm$ 0.22 (26) | 37.48 $\pm$ 0.32 (25) |
| 15          | 37.73 $\pm$ 0.24 (26) | 37.79 $\pm$ 0.26 (26) | 37.82 $\pm$ 0.21 (26) | 37.55 $\pm$ 0.31 (25) |
| 16          | 37.77 $\pm$ 0.26 (26) | 37.86 $\pm$ 0.23 (26) | 37.92 $\pm$ 0.20 (26) | 37.68 $\pm$ 0.33 (25) |
| 17          | 37.85 $\pm$ 0.28 (26) | 37.99 $\pm$ 0.27 (26) | 38.04 $\pm$ 0.21 (26) | 37.84 $\pm$ 0.28 (25) |
| 18          | 37.90 $\pm$ 0.26 (26) | 38.02 $\pm$ 0.27 (26) | 38.16 $\pm$ 0.18 (26) | 37.98 $\pm$ 0.34 (25) |
| 19          | 38.01 $\pm$ 0.27 (26) | 38.15 $\pm$ 0.24 (26) | 38.33 $\pm$ 0.20 (26) | 38.23 $\pm$ 0.32 (25) |
| 20          | 38.18 $\pm$ 0.25 (26) | 38.33 $\pm$ 0.21 (26) | 38.48 $\pm$ 0.19 (26) | 38.44 $\pm$ 0.25 (25) |
| 21          | 38.18 $\pm$ 0.23 (26) | 38.37 $\pm$ 0.23 (26) | 38.48 $\pm$ 0.21 (26) | 38.42 $\pm$ 0.25 (25) |
| 22          | 38.10 $\pm$ 0.22 (26) | 38.36 $\pm$ 0.21 (26) | 38.44 $\pm$ 0.18 (26) | 38.33 $\pm$ 0.21 (25) |
| 23          | 38.07 $\pm$ 0.22 (26) | 38.36 $\pm$ 0.16 (26) | 38.36 $\pm$ 0.21 (26) | 38.24 $\pm$ 0.25 (25) |
| 0           | 38.07 $\pm$ 0.27 (26) | 38.28 $\pm$ 0.16 (26) | 38.28 $\pm$ 0.23 (26) | 38.22 $\pm$ 0.23 (25) |
| 1           | 38.05 $\pm$ 0.28 (26) | 38.17 $\pm$ 0.22 (26) | 38.21 $\pm$ 0.23 (26) | 38.16 $\pm$ 0.17 (25) |
| 2           | 38.05 $\pm$ 0.26 (26) | 38.13 $\pm$ 0.22 (26) | 38.11 $\pm$ 0.24 (26) | 38.07 $\pm$ 0.20 (25) |
| 3           | 37.98 $\pm$ 0.22 (26) | 38.13 $\pm$ 0.21 (26) | 38.17 $\pm$ 0.23 (26) | 38.03 $\pm$ 0.26 (25) |
| 4           | 37.95 $\pm$ 0.25 (26) | 38.12 $\pm$ 0.26 (26) | 38.11 $\pm$ 0.27 (26) | 38.05 $\pm$ 0.27 (25) |
| 5           | 37.85 $\pm$ 0.31 (26) | 38.05 $\pm$ 0.29 (26) | 38.10 $\pm$ 0.30 (26) | 37.99 $\pm$ 0.27 (25) |
| 6           | 37.88 $\pm$ 0.28 (26) | 38.04 $\pm$ 0.36 (26) | 38.18 $\pm$ 0.27 (26) | 38.01 $\pm$ 0.29 (25) |
| 7           | 37.94 $\pm$ 0.30 (26) | 38.06 $\pm$ 0.29 (26) | 38.20 $\pm$ 0.25 (26) | 38.00 $\pm$ 0.27 (25) |
| 8           | 37.95 $\pm$ 0.30 (26) | 38.03 $\pm$ 0.32 (26) | 38.02 $\pm$ 0.31 (26) | 37.92 $\pm$ 0.31 (25) |

Table S7. Active  $T_b$  throughout the day during baseline, lactation and post lactation. The data are expressed as means  $\pm$  S.D.

| Time (h) | Baseline (n)      | Lactation (n)     | Post lactation (n) |
|----------|-------------------|-------------------|--------------------|
| 10       | 37.48 ± 0.51 (26) | 37.91 ± 0.22 (26) | 37.52 ± 0.39 (17)  |
| 11       | 36.96 ± 0.36 (26) | 37.73 ± 0.18 (26) | 37.10 ± 0.33 (17)  |
| 12       | 36.75 ± 0.38 (26) | 37.67 ± 0.15 (26) | 36.89 ± 0.34 (17)  |
| 13       | 36.87 ± 0.32 (26) | 37.77 ± 0.25 (26) | 36.78 ± 0.31 (17)  |
| 14       | 36.85 ± 0.28 (26) | 37.78 ± 0.22 (26) | 36.88 ± 0.30 (17)  |
| 15       | 36.78 ± 0.28 (26) | 37.79 ± 0.20 (26) | 36.82 ± 0.31 (17)  |
| 16       | 36.96 ± 0.30 (26) | 37.86 ± 0.20 (26) | 36.99 ± 0.29 (17)  |
| 17       | 37.19 ± 0.33 (26) | 37.97 ± 0.22 (26) | 37.16 ± 0.29 (17)  |
| 18       | 37.29 ± 0.30 (26) | 38.06 ± 0.22 (26) | 37.37 ± 0.28 (17)  |
| 19       | 37.83 ± 0.40 (26) | 38.21 ± 0.19 (26) | 37.79 ± 0.23 (17)  |
| 20       | 38.20 ± 0.44 (26) | 38.38 ± 0.18 (26) | 38.17 ± 0.31 (17)  |
| 21       | 38.11 ± 0.40 (26) | 38.38 ± 0.18 (26) | 38.14 ± 0.31 (17)  |
| 22       | 38.05 ± 0.37 (26) | 38.33 ± 0.14 (26) | 38.09 ± 0.26 (17)  |
| 23       | 38.06 ± 0.33 (26) | 38.29 ± 0.15 (26) | 38.07 ± 0.27 (17)  |
| 0        | 37.96 ± 0.28 (26) | 38.25 ± 0.16 (26) | 38.08 ± 0.30 (17)  |
| 1        | 37.89 ± 0.24 (26) | 38.19 ± 0.16 (26) | 38.03 ± 0.31 (17)  |
| 2        | 37.66 ± 0.31 (26) | 38.14 ± 0.18 (26) | 37.90 ± 0.30 (17)  |
| 3        | 37.61 ± 0.29 (26) | 38.12 ± 0.19 (26) | 37.82 ± 0.29 (17)  |
| 4        | 37.48 ± 0.32 (26) | 38.09 ± 0.21 (26) | 37.72 ± 0.27 (17)  |
| 5        | 37.40 ± 0.35 (26) | 38.03 ± 0.24 (26) | 37.63 ± 0.36 (17)  |
| 6        | 37.45 ± 0.42 (26) | 38.07 ± 0.23 (26) | 37.59 ± 0.34 (17)  |
| 7        | 37.54 ± 0.38 (26) | 38.10 ± 0.19 (26) | 37.54 ± 0.43 (17)  |
| 8        | 37.48 ± 0.51 (26) | 37.94 ± 0.25 (26) | 37.62 ± 0.36 (17)  |

Table S8. Active  $T_b$  throughout the day during the four stages of lactation. The data are expressed as means  $\pm$  S.D.

| Time (h) | Lactation             |                       |                       |                       |
|----------|-----------------------|-----------------------|-----------------------|-----------------------|
|          | DOL 1-5 (n)           | DOL 6-10 (n)          | DOL 11-15 (n)         | DOL 16-20 (n)         |
| 10       | 37.95 $\pm$ 0.23 (26) | 38.01 $\pm$ 0.28 (26) | 37.94 $\pm$ 0.22 (26) | 37.67 $\pm$ 0.30 (25) |
| 11       | 37.80 $\pm$ 0.20 (26) | 37.86 $\pm$ 0.21 (26) | 37.71 $\pm$ 0.23 (26) | 37.46 $\pm$ 0.29 (25) |
| 12       | 37.72 $\pm$ 0.20 (26) | 37.81 $\pm$ 0.22 (26) | 37.70 $\pm$ 0.18 (26) | 37.42 $\pm$ 0.28 (25) |
| 13       | 37.81 $\pm$ 0.26 (26) | 37.87 $\pm$ 0.30 (26) | 37.84 $\pm$ 0.29 (26) | 37.51 $\pm$ 0.32 (25) |
| 14       | 37.82 $\pm$ 0.26 (26) | 37.88 $\pm$ 0.24 (26) | 37.85 $\pm$ 0.23 (26) | 37.51 $\pm$ 0.34 (25) |
| 15       | 37.80 $\pm$ 0.22 (26) | 37.85 $\pm$ 0.24 (26) | 37.86 $\pm$ 0.21 (26) | 37.59 $\pm$ 0.31 (25) |
| 16       | 37.84 $\pm$ 0.26 (26) | 37.91 $\pm$ 0.23 (26) | 37.96 $\pm$ 0.19 (26) | 37.71 $\pm$ 0.30 (25) |
| 17       | 37.89 $\pm$ 0.30 (26) | 38.05 $\pm$ 0.26 (26) | 38.07 $\pm$ 0.20 (26) | 37.86 $\pm$ 0.28 (25) |
| 18       | 37.96 $\pm$ 0.25 (26) | 38.05 $\pm$ 0.26 (26) | 38.17 $\pm$ 0.18 (26) | 38.01 $\pm$ 0.32 (25) |
| 19       | 38.05 $\pm$ 0.25 (26) | 38.18 $\pm$ 0.24 (26) | 38.35 $\pm$ 0.20 (26) | 38.24 $\pm$ 0.31 (25) |
| 20       | 38.21 $\pm$ 0.26 (26) | 38.35 $\pm$ 0.20 (26) | 38.49 $\pm$ 0.19 (26) | 38.45 $\pm$ 0.25 (25) |
| 21       | 38.21 $\pm$ 0.23 (26) | 38.39 $\pm$ 0.23 (26) | 38.50 $\pm$ 0.21 (26) | 38.44 $\pm$ 0.25 (25) |
| 22       | 38.14 $\pm$ 0.22 (26) | 38.39 $\pm$ 0.20 (26) | 38.46 $\pm$ 0.18 (26) | 38.35 $\pm$ 0.22 (25) |
| 23       | 38.11 $\pm$ 0.21 (26) | 38.38 $\pm$ 0.15 (26) | 38.38 $\pm$ 0.20 (26) | 38.26 $\pm$ 0.24 (25) |
| 0        | 38.10 $\pm$ 0.25 (26) | 38.31 $\pm$ 0.14 (26) | 38.31 $\pm$ 0.22 (26) | 38.26 $\pm$ 0.22 (25) |
| 1        | 38.09 $\pm$ 0.27 (26) | 38.21 $\pm$ 0.21 (26) | 38.26 $\pm$ 0.21 (26) | 38.17 $\pm$ 0.17 (25) |
| 2        | 38.09 $\pm$ 0.25 (26) | 38.16 $\pm$ 0.22 (26) | 38.13 $\pm$ 0.22 (26) | 38.11 $\pm$ 0.21 (25) |
| 3        | 38.01 $\pm$ 0.20 (26) | 38.15 $\pm$ 0.21 (26) | 38.19 $\pm$ 0.22 (26) | 38.05 $\pm$ 0.27 (25) |
| 4        | 37.98 $\pm$ 0.24 (26) | 38.14 $\pm$ 0.26 (26) | 38.15 $\pm$ 0.23 (26) | 38.07 $\pm$ 0.28 (25) |
| 5        | 37.88 $\pm$ 0.31 (26) | 38.10 $\pm$ 0.29 (26) | 38.13 $\pm$ 0.29 (26) | 38.00 $\pm$ 0.27 (25) |
| 6        | 37.89 $\pm$ 0.30 (26) | 38.07 $\pm$ 0.34 (26) | 38.21 $\pm$ 0.27 (26) | 38.03 $\pm$ 0.30 (25) |
| 7        | 37.97 $\pm$ 0.29 (26) | 38.11 $\pm$ 0.26 (26) | 38.24 $\pm$ 0.24 (26) | 38.02 $\pm$ 0.27 (25) |
| 8        | 37.98 $\pm$ 0.29 (26) | 38.07 $\pm$ 0.31 (26) | 37.96 $\pm$ 0.57 (26) | 37.93 $\pm$ 0.31 (25) |

Table S9. Inactive  $T_b$  throughout the day during baseline, lactation and post-lactation. The data are expressed as means  $\pm$  S.D.



| Time (h) | Baseline (n)      | Lactation (n)     | Post-lactation (n) |
|----------|-------------------|-------------------|--------------------|
| 10       | 36.77 ± 0.38 (26) | 37.70 ± 0.18 (26) | 36.90 ± 0.31 (17)  |
| 11       | 36.53 ± 0.32 (26) | 37.55 ± 0.21 (26) | 36.64 ± 0.33 (17)  |
| 12       | 36.42 ± 0.27 (26) | 37.50 ± 0.20 (26) | 36.52 ± 0.31 (17)  |
| 13       | 36.52 ± 0.34 (26) | 37.61 ± 0.30 (26) | 36.48 ± 0.32 (17)  |
| 14       | 36.51 ± 0.30 (26) | 37.60 ± 0.21 (26) | 36.49 ± 0.32 (17)  |
| 15       | 36.48 ± 0.30 (26) | 37.58 ± 0.23 (26) | 36.52 ± 0.31 (17)  |
| 16       | 36.53 ± 0.29 (26) | 37.67 ± 0.23 (26) | 36.58 ± 0.33 (17)  |
| 17       | 36.63 ± 0.35 (26) | 37.77 ± 0.23 (26) | 36.68 ± 0.31 (17)  |
| 18       | 36.78 ± 0.37 (26) | 37.83 ± 0.24 (26) | 36.90 ± 0.37 (17)  |
| 19       | 37.01 ± 0.48 (26) | 37.99 ± 0.24 (26) | 37.07 ± 0.42 (17)  |
| 20       | 37.13 ± 0.68 (16) | 38.18 ± 0.21 (26) | 37.28 ± 0.51 (16)  |
| 21       | 37.11 ± 0.62 (18) | 38.21 ± 0.22 (26) | 37.36 ± 0.52 (17)  |
| 22       | 37.11 ± 0.47 (18) | 38.14 ± 0.21 (26) | 37.39 ± 0.43 (17)  |
| 23       | 37.11 ± 0.42 (20) | 38.11 ± 0.19 (26) | 37.23 ± 0.47 (17)  |
| 0        | 36.87 ± 0.45 (24) | 38.01 ± 0.20 (26) | 37.29 ± 0.40 (16)  |
| 1        | 36.87 ± 0.48 (24) | 37.96 ± 0.18 (26) | 37.14 ± 0.55 (17)  |
| 2        | 36.77 ± 0.51 (26) | 37.88 ± 0.19 (26) | 37.13 ± 0.43 (17)  |
| 3        | 36.73 ± 0.55 (25) | 37.90 ± 0.19 (26) | 36.92 ± 0.54 (17)  |
| 4        | 36.55 ± 0.42 (26) | 37.94 ± 0.24 (26) | 36.74 ± 0.59 (17)  |
| 5        | 36.49 ± 0.59 (25) | 37.84 ± 0.23 (26) | 36.80 ± 0.52 (17)  |
| 6        | 36.57 ± 0.54 (26) | 37.84 ± 0.25 (26) | 36.77 ± 0.50 (17)  |
| 7        | 36.66 ± 0.47 (26) | 37.84 ± 0.30 (26) | 36.82 ± 0.41 (17)  |
| 8        | 36.77 ± 0.44 (26) | 37.68 ± 0.35 (26) | 36.81 ± 0.48 (17)  |

Table S10. Inactive  $T_b$  throughout the day during the four stages of lactation. The data are expressed as means  $\pm$  S.D.

| Time<br>(h) | Lactation             |                       |                       |                       |
|-------------|-----------------------|-----------------------|-----------------------|-----------------------|
|             | DOL 1-5 (n)           | DOL 6-10 (n)          | DOL 11-15 (n)         | DOL 16-20 (n)         |
| 10          | 37.76 $\pm$ 0.24 (26) | 37.85 $\pm$ 0.32 (26) | 37.84 $\pm$ 0.25 (26) | 37.59 $\pm$ 0.31 (25) |
| 11          | 37.63 $\pm$ 0.27 (26) | 37.60 $\pm$ 0.28 (26) | 37.62 $\pm$ 0.23 (26) | 37.41 $\pm$ 0.28 (25) |
| 12          | 37.56 $\pm$ 0.23 (26) | 37.58 $\pm$ 0.20 (26) | 37.62 $\pm$ 0.22 (26) | 37.28 $\pm$ 0.30 (25) |
| 13          | 37.65 $\pm$ 0.33 (26) | 37.70 $\pm$ 0.38 (26) | 37.72 $\pm$ 0.29 (25) | 37.50 $\pm$ 0.51 (25) |
| 14          | 37.62 $\pm$ 0.29 (26) | 37.66 $\pm$ 0.26 (26) | 37.74 $\pm$ 0.21 (26) | 37.43 $\pm$ 0.35 (25) |
| 15          | 37.54 $\pm$ 0.25 (26) | 37.65 $\pm$ 0.28 (26) | 37.73 $\pm$ 0.25 (26) | 37.46 $\pm$ 0.35 (25) |
| 16          | 37.65 $\pm$ 0.30 (26) | 37.72 $\pm$ 0.28 (26) | 37.78 $\pm$ 0.22 (26) | 37.59 $\pm$ 0.42 (25) |
| 17          | 37.67 $\pm$ 0.26 (26) | 37.85 $\pm$ 0.32 (26) | 37.95 $\pm$ 0.25 (26) | 37.74 $\pm$ 0.32 (25) |
| 18          | 37.70 $\pm$ 0.36 (26) | 37.89 $\pm$ 0.29 (26) | 38.05 $\pm$ 0.22 (26) | 37.82 $\pm$ 0.42 (25) |
| 19          | 37.84 $\pm$ 0.32 (26) | 37.97 $\pm$ 0.32 (26) | 38.23 $\pm$ 0.31 (26) | 38.09 $\pm$ 0.37 (25) |
| 20          | 38.07 $\pm$ 0.31 (26) | 38.24 $\pm$ 0.36 (26) | 38.41 $\pm$ 0.30 (25) | 38.32 $\pm$ 0.28 (23) |
| 21          | 38.02 $\pm$ 0.31 (25) | 38.29 $\pm$ 0.29 (26) | 38.38 $\pm$ 0.27 (25) | 38.23 $\pm$ 0.38 (25) |
| 22          | 37.95 $\pm$ 0.37 (26) | 38.22 $\pm$ 0.30 (25) | 38.30 $\pm$ 0.32 (26) | 38.12 $\pm$ 0.42 (25) |
| 23          | 37.91 $\pm$ 0.36 (25) | 38.27 $\pm$ 0.24 (26) | 38.29 $\pm$ 0.36 (26) | 38.13 $\pm$ 0.43 (24) |
| 0           | 37.94 $\pm$ 0.32 (26) | 38.18 $\pm$ 0.23 (26) | 38.11 $\pm$ 0.36 (25) | 38.01 $\pm$ 0.41 (25) |
| 1           | 37.85 $\pm$ 0.35 (26) | 38.04 $\pm$ 0.29 (26) | 38.03 $\pm$ 0.28 (26) | 38.08 $\pm$ 0.32 (25) |
| 2           | 37.80 $\pm$ 0.29 (26) | 37.99 $\pm$ 0.27 (25) | 38.07 $\pm$ 0.34 (26) | 37.89 $\pm$ 0.30 (25) |
| 3           | 37.73 $\pm$ 0.27 (26) | 38.00 $\pm$ 0.32 (26) | 38.11 $\pm$ 0.30 (26) | 37.94 $\pm$ 0.28 (25) |
| 4           | 37.87 $\pm$ 0.37 (25) | 38.02 $\pm$ 0.28 (25) | 38.06 $\pm$ 0.36 (26) | 37.85 $\pm$ 0.37 (23) |
| 5           | 37.67 $\pm$ 0.28 (25) | 37.89 $\pm$ 0.30 (26) | 38.00 $\pm$ 0.36 (25) | 37.90 $\pm$ 0.28 (25) |
| 6           | 37.70 $\pm$ 0.28 (25) | 37.90 $\pm$ 0.39 (26) | 38.04 $\pm$ 0.34 (25) | 37.93 $\pm$ 0.32 (25) |
| 7           | 37.80 $\pm$ 0.38 (25) | 37.86 $\pm$ 0.43 (25) | 38.02 $\pm$ 0.29 (26) | 37.73 $\pm$ 0.34 (24) |
| 8           | 37.77 $\pm$ 0.31 (26) | 37.87 $\pm$ 0.36 (25) | 37.86 $\pm$ 0.36 (26) | 37.74 $\pm$ 0.35 (25) |
